# Supplementary material for: Age-related kinematic performance should be considered during fast head-neck rotation target task in individuals aged from 8 to 85 years old
Source: PeerJ. 2019 Jun 10;7:e7095. doi: 10.7717/peerj.7095 (PMC6563793; doi:10.7717/peerj.7095)
Supplement: Supplemental Information 1 [file peerj-07-7095-s001.xlsx]

## Sheet: MaxS
Ages	YoungAdults3/OldAdult4/Children6/Seniors8	Women1_Men2	Subjects	Maximum rotational speed
22	3	2	2	130.363
24	3	1	4	97.1034
22	3	1	6	70.5041
24	3	2	7	64.3011
24	3	2	8	92.8228
22	3	1	9	86.905
22	3	1	10	68.0475
27	3	1	11	48.3079
23	3	1	12	80.4308
22	3	1	13	80.2231
28	3	1	14	79.9346
22	3	1	15	96.5884
31	3	2	17	101.807
30	3	2	18	77.7185
46	4	2	19	136.492
44	4	1	20	79.6856
48	4	1	21	81.5661
38	4	1	22	76.5149
57	4	2	31	53.8004
59	4	2	32	69.6697
61	4	2	33	90.5743
52	4	1	34	100.256
56	4	1	35	55.441
52	4	2	36	71.1217
50	4	2	37	75.6363
55	4	2	38	72.2847
51	4	1	41	82.9973
58	4	2	42	100.943
59	4	2	43	67.2612
54	4	2	44	52.4107
52	4	1	45	124.039
26	3	2	46	109.821
27	3	1	47	51.5152
26	3	1	48	67.7232
21	3	1	49	71.0007
22	3	2	50	79.7347
22	3	1	51	69.6748
21	3	2	52	76.2162
23	3	2	53	74.8266
19	3	2	54	83.8419
21	3	1	55	107.603
24	3	2	56	68.347
23	3	2	57	95.9907
22	3	1	58	82.6381
23	3	2	59	105.676
18	3	1	60	78.7392
50	4	2	61	78.8578
68	8	2	101	93.2912
71	8	2	102	59.3117
65	8	1	103	93.2444
71	8	2	104	97.9785
69	8	1	105	87.682
73	8	2	106	129.647
72	8	2	107	78.8996
67	8	1	108	71.3333
68	8	2	109	126.468
69	8	1	110	99.8084
72	8	2	111	73.0058
79	8	1	112	54.4804
83	8	1	113	69.0987
73	8	1	114	37.0769
72	8	2	115	85.8147
79	8	2	116	86.9097
11	6	2	117	92.4485
12	6	1	118	74.4699
14	6	1	119	92.4485
11	6	1	120	71.6128
9	6	1	121	76.0336
9	6	1	122	84.3077
12	6	1	123	39.679
9	6	2	124	74.2458
14	6	1	125	74.031
12	6	1	126	86.4772
12	6	1	127	74.5343
13	6	1	128	75.6288
10	6	2	129	71.3507
8	6	2	130	67.4997
10	6	2	131	76.92
12	6	1	132	79.7693
83	8	1	143	57.099

## Sheet: MinS
Ages	YoungAdults3/OldAdult4/Children6/Seniors8	Women1_Men2	Subjects	Minimum rotational speed
22	3	2	2	5.17307
24	3	1	4	10.6396
22	3	1	6	4.54218
24	3	2	7	2.95739
24	3	2	8	8.25878
22	3	1	9	7.20809
22	3	1	10	8.77341
27	3	1	11	3.45464
23	3	1	12	4.58725
22	3	1	13	6.04132
28	3	1	14	7.73356
22	3	1	15	7.46756
31	3	2	17	7.26716
30	3	2	18	4.40659
46	4	2	19	8.04141
44	4	1	20	7.18729
48	4	1	21	5.9426
38	4	1	22	3.4022
57	4	2	31	4.01131
59	4	2	32	4.62327
61	4	2	33	5.49839
52	4	1	34	5.35111
56	4	1	35	4.99636
52	4	2	36	3.26899
50	4	2	37	4.72998
55	4	2	38	3.60202
51	4	1	41	7.56975
58	4	2	42	5.95846
59	4	2	43	5.5961
54	4	2	44	6.24572
52	4	1	45	9.94366
26	3	2	46	6.53361
27	3	1	47	2.0705
26	3	1	48	3.39581
21	3	1	49	5.65777
22	3	2	50	6.10912
22	3	1	51	7.30217
21	3	2	52	3.33082
23	3	2	53	3.56317
19	3	2	54	3.14529
21	3	1	55	4.66281
24	3	2	56	3.01482
23	3	2	57	3.11107
22	3	1	58	5.38055
23	3	2	59	6.1776
18	3	1	60	4.87173
50	4	2	61	5.31554
68	8	2	101	4.66801
71	8	2	102	5.97979
65	8	1	103	15.6809
71	8	2	104	3.24176
69	8	1	105	2.78782
73	8	2	106	6.97341
72	8	2	107	7.49841
67	8	1	108	3.5751
68	8	2	109	9.29224
69	8	1	110	8.55332
72	8	2	111	4.41497
79	8	1	112	2.74035
83	8	1	113	14.5412
73	8	1	114	6.61593
72	8	2	115	4.30495
79	8	2	116	6.64432
11	6	2	117	6.25852
12	6	1	118	4.79918
14	6	1	119	6.25852
11	6	1	120	3.78975
9	6	1	121	5.74276
9	6	1	122	12.5557
12	6	1	123	6.60784
9	6	2	124	7.08827
14	6	1	125	6.21652
12	6	1	126	10.9664
12	6	1	127	10.4173
13	6	1	128	4.68492
10	6	2	129	9.24073
8	6	2	130	3.82349
10	6	2	131	3.92093
12	6	1	132	14.0272
83	8	1	143	3.75784

## Sheet: MeanS
Ages	YoungAdults3/OldAdult4/Children6/Seniors8	Women1_Men2	Subjects	Average rotational Speed
22	3	2	2	17.1088
24	3	1	4	11.0023
22	3	1	6	15.3761
24	3	2	7	13.6202
24	3	2	8	11.8991
22	3	1	9	15.7975
22	3	1	10	11.3346
27	3	1	11	14.1594
23	3	1	12	13.73
22	3	1	13	11.0212
28	3	1	14	12.2811
22	3	1	15	13.7733
31	3	2	17	15.2023
30	3	2	18	17.1684
46	4	2	19	14.1829
44	4	1	20	15.468
48	4	1	21	13.0284
38	4	1	22	15.3761
57	4	2	31	13.0589
59	4	2	32	10.9796
61	4	2	33	12.6455
52	4	1	34	15.6512
56	4	1	35	9.86311
52	4	2	36	17.0607
50	4	2	37	13.9786
55	4	2	38	18.3101
51	4	1	41	12.443
58	4	2	42	13.2467
59	4	2	43	12.9449
54	4	2	44	10.4325
52	4	1	45	9.89522
26	3	2	46	15.8499
27	3	1	47	14.1987
26	3	1	48	11.9018
21	3	1	49	10.5411
22	3	2	50	13.4485
22	3	1	51	11.0158
21	3	2	52	12.8684
23	3	2	53	14.4181
19	3	2	54	14.7332
21	3	1	55	13.8771
24	3	2	56	14.4872
23	3	2	57	17.1357
22	3	1	58	14.1923
23	3	2	59	13.5725
18	3	1	60	12.2916
50	4	2	61	11.416
68	8	2	101	13.4312
71	8	2	102	12.1374
65	8	1	103	6.94103
71	8	2	104	12.8902
69	8	1	105	10.8093
73	8	2	106	14.3723
72	8	2	107	11.9655
67	8	1	108	11.12
68	8	2	109	13.7113
69	8	1	110	9.33523
72	8	2	111	9.8162
79	8	1	112	10.1474
83	8	1	113	6.25189
73	8	1	114	7.24298
72	8	2	115	10.8103
79	8	2	116	10.7295
11	6	2	117	10.7902
12	6	1	118	12.4231
14	6	1	119	11.2622
11	6	1	120	11.0895
9	6	1	121	6.38804
9	6	1	122	6.58105
12	6	1	123	7.80595
9	6	2	124	6.56047
14	6	1	125	12.9119
12	6	1	126	9.44371
12	6	1	127	8.09199
13	6	1	128	9.19056
10	6	2	129	6.34382
8	6	2	130	10.6022
10	6	2	131	12.6302
12	6	1	132	7.88313
83	8	1	143	8.39914

## Sheet: OS
Ages	YoungAdults3/OldAdult4/Children6/Seniors8	Women1_Men2	Subjects	Overshoot
22	3	2	2	1.07449
24	3	1	4	1.86244
22	3	1	6	0.653592
24	3	2	7	0.33744
24	3	2	8	0.875671
22	3	1	9	1.18594
22	3	1	10	1.19981
27	3	1	11	0.483475
23	3	1	12	0.707399
22	3	1	13	1.01147
28	3	1	14	1.23363
22	3	1	15	1.29661
31	3	2	17	0.850995
30	3	2	18	0.517854
46	4	2	19	1.30366
44	4	1	20	1.07541
48	4	1	21	0.901246
38	4	1	22	0.53403
57	4	2	31	0.499665
59	4	2	32	0.503182
61	4	2	33	0.59129
52	4	1	34	0.718315
56	4	1	35	0.633621
52	4	2	36	0.514168
50	4	2	37	0.417009
55	4	2	38	0.384356
51	4	1	41	1.08855
58	4	2	42	0.830283
59	4	2	43	0.795949
54	4	2	44	0.745596
52	4	1	45	2.05307
26	3	2	46	0.827763
27	3	1	47	0.2353
26	3	1	48	0.410292
21	3	1	49	0.844851
22	3	2	50	0.865223
22	3	1	51	1.53552
21	3	2	52	0.361281
23	3	2	53	0.47541
19	3	2	54	0.38903
21	3	1	55	0.719495
24	3	2	56	0.449789
23	3	2	57	0.52263
22	3	1	58	0.850591
23	3	2	59	1.13332
18	3	1	60	0.740916
50	4	2	61	1.11524
68	8	2	101	0.52422
71	8	2	102	0.569234
65	8	1	103	2.83086
71	8	2	104	0.55439
69	8	1	105	0.396036
73	8	2	106	0.72806
72	8	2	107	0.499613
67	8	1	108	0.696026
68	8	2	109	1.34082
69	8	1	110	1.22035
72	8	2	111	0.672579
79	8	1	112	0.30467
83	8	1	113	1.80747
73	8	1	114	0.572534
72	8	2	115	0.490196
79	8	2	116	0.610954
11	6	2	117	1.08726
12	6	1	118	0.668893
14	6	1	119	1.07661
11	6	1	120	0.627436
9	6	1	121	1.31038
9	6	1	122	1.66225
12	6	1	123	0.748859
9	6	2	124	0.985528
14	6	1	125	0.759363
12	6	1	126	1.58705
12	6	1	127	1.88193
13	6	1	128	0.835313
10	6	2	129	1.27394
8	6	2	130	0.469564
10	6	2	131	0.637283
12	6	1	132	1.73132
83	8	1	143	0.424518

## Sheet: Dec
Ages	YoungAdults3/OldAdult4/Children6/Seniors8	Women1_Men2	Subjects	Rotational Deceleration
22	3	2	2	-5.26593
24	3	1	4	-2.92796
22	3	1	6	-3.82006
24	3	2	7	-2.46727
24	3	2	8	-2.91621
22	3	1	9	-4.15005
22	3	1	10	-2.14488
27	3	1	11	-2.3843
23	3	1	12	-3.03311
22	3	1	13	-2.12234
28	3	1	14	-2.58179
22	3	1	15	-3.57665
31	3	2	17	-3.80502
30	3	2	18	-3.70292
46	4	2	19	-5.00166
44	4	1	20	-3.83871
48	4	1	21	-3.10818
38	4	1	22	-3.26604
57	4	2	31	-2.07556
59	4	2	32	-2.19665
61	4	2	33	-2.93514
52	4	1	34	-3.71519
56	4	1	35	-1.80935
52	4	2	36	-3.48897
50	4	2	37	-2.9211
55	4	2	38	-3.90505
51	4	1	41	-3.63143
58	4	2	42	-4.02064
59	4	2	43	-2.34707
54	4	2	44	-1.7724
52	4	1	45	-3.22206
26	3	2	46	-4.55263
27	3	1	47	-2.47876
26	3	1	48	-2.12528
21	3	1	49	-2.23394
22	3	2	50	-3.40748
22	3	1	51	-2.25449
21	3	2	52	-2.95506
23	3	2	53	-2.92938
19	3	2	54	-3.56082
21	3	1	55	-4.0088
24	3	2	56	-2.9554
23	3	2	57	-4.06022
22	3	1	58	-3.01083
23	3	2	59	-3.37507
18	3	1	60	-2.50388
50	4	2	61	-2.60169
68	8	2	101	-3.33021
71	8	2	102	-1.95431
65	8	1	103	-1.87071
71	8	2	104	-3.39359
69	8	1	105	-2.93715
73	8	2	106	-4.49859
72	8	2	107	-2.30417
67	8	1	108	-2.48117
68	8	2	109	-4.53655
69	8	1	110	-2.20657
72	8	2	111	-2.19286
79	8	1	112	-1.61293
83	8	1	113	-1.53098
73	8	1	114	-1.06058
72	8	2	115	-2.47573
79	8	2	116	-2.66544
11	6	2	117	-2.82816
12	6	1	118	-2.04991
14	6	1	119	-3.0351
11	6	1	120	-2.21122
9	6	1	121	-1.24958
9	6	1	122	-1.40692
12	6	1	123	-1.06826
9	6	2	124	-1.57748
14	6	1	125	-2.97644
12	6	1	126	-2.35311
12	6	1	127	-1.61285
13	6	1	128	-1.71994
10	6	2	129	-1.18505
8	6	2	130	-1.83518
10	6	2	131	-2.69781
12	6	1	132	-2.06167
83	8	1	143	-1.41482

## Sheet: Acc
Ages	YoungAdults3/OldAdult4/Children6/Seniors8	Women1_Men2	Subjects	Rotational Acceleration
22	3	2	2	22.6826
24	3	1	4	15.1617
22	3	1	6	10.4556
24	3	2	7	9.63927
24	3	2	8	12.4625
22	3	1	9	11.8209
22	3	1	10	10.5518
27	3	1	11	6.50577
23	3	1	12	11.9199
22	3	1	13	9.71788
28	3	1	14	11.1325
22	3	1	15	15.4969
31	3	2	17	16.8523
30	3	2	18	16.4196
46	4	2	19	27.9138
44	4	1	20	11.3282
48	4	1	21	13.3979
38	4	1	22	13.9061
57	4	2	31	8.35016
59	4	2	32	8.23205
61	4	2	33	14.787
52	4	1	34	16.976
56	4	1	35	5.09474
52	4	2	36	11.2306
50	4	2	37	11.4375
55	4	2	38	14.166
51	4	1	41	12.3269
58	4	2	42	18.4094
59	4	2	43	8.43629
54	4	2	44	5.32999
52	4	1	45	17.6192
26	3	2	46	16.302
27	3	1	47	5.74956
26	3	1	48	8.45922
21	3	1	49	8.60244
22	3	2	50	10.1718
22	3	1	51	7.49584
21	3	2	52	10.6639
23	3	2	53	8.85857
19	3	2	54	14.4785
21	3	1	55	15.1157
24	3	2	56	8.76547
23	3	2	57	17.1129
22	3	1	58	11.9789
23	3	2	59	17.5541
18	3	1	60	7.83515
50	4	2	61	11.8129
68	8	2	101	14.842
71	8	2	102	7.51109
65	8	1	103	12.6421
71	8	2	104	14.8305
69	8	1	105	10.1923
73	8	2	106	22.7905
72	8	2	107	9.81159
67	8	1	108	9.85235
68	8	2	109	21.9296
69	8	1	110	13.0462
72	8	2	111	13.2633
79	8	1	112	5.96801
83	8	1	113	6.75452
73	8	1	114	3.89899
72	8	2	115	10.1585
79	8	2	116	12.6516
11	6	2	117	11.6309
12	6	1	118	8.03094
14	6	1	119	10.339
11	6	1	120	9.52929
9	6	1	121	7.47013
9	6	1	122	8.5204
12	6	1	123	4.09272
9	6	2	124	9.41105
14	6	1	125	10.73
12	6	1	126	9.73542
12	6	1	127	4.77688
13	6	1	128	8.31025
10	6	2	129	5.88154
8	6	2	130	7.93876
10	6	2	131	10.3098
12	6	1	132	8.27758
83	8	1	143	7.94245

## Sheet: TT
Ages	YoungAdults3/OldAdult4/Children6/Seniors8	Women1_Men2	Subjects	DidRen Total Time
22	3	2	2	43.812
24	3	1	4	57.342
22	3	1	6	49.187
24	3	2	7	53.75
24	3	2	8	61.25
22	3	1	9	47.187
22	3	1	10	58.953
27	3	1	11	47.625
23	3	1	12	51.233
22	3	1	13	65.062
28	3	1	14	55.936
22	3	1	15	50.438
31	3	2	17	50.25
30	3	2	18	43.313
46	4	2	19	48.11
44	4	1	20	48.5
48	4	1	21	51.734
38	4	1	22	43.422
57	4	2	31	52.78
59	4	2	32	51.671
61	4	2	33	57.015
52	4	1	34	51.687
56	4	1	35	67.421
52	4	2	36	42.859
50	4	2	37	51.39
55	4	2	38	41.516
51	4	1	41	55.436
58	4	2	42	52.234
59	4	2	43	50.187
54	4	2	44	58.281
52	4	1	45	63.499
26	3	2	46	42.11
27	3	1	47	44.546
26	3	1	48	55
21	3	1	49	60.546
22	3	2	50	46.188
22	3	1	51	59.577
21	3	2	52	49.562
23	3	2	53	47.093
19	3	2	54	41.874
21	3	1	55	44.985
24	3	2	56	42.218
23	3	2	57	38.14
22	3	1	58	45.11
23	3	2	59	48.75
18	3	1	60	44.983
50	4	2	61	47.687
68	8	2	101	47.344
71	8	2	102	50.187
65	8	1	103	54.109
71	8	2	104	53.516
69	8	1	105	59.561
73	8	2	106	45.063
72	8	2	107	51.109
67	8	1	108	53.5
68	8	2	109	50.828
69	8	1	110	63.312
72	8	2	111	62.187
79	8	1	112	60.75
83	8	1	113	103.233
73	8	1	114	85.764
72	8	2	115	56.703
79	8	2	116	58.015
11	6	2	117	53.983
12	6	1	118	50.359
14	6	1	119	55.624
11	6	1	120	56.86
9	6	1	121	75
9	6	1	122	97.625
12	6	1	123	76.812
9	6	2	124	86.92
14	6	1	125	52.438
12	6	1	126	72.938
12	6	1	127	61.312
13	6	1	128	65.734
10	6	2	129	110.499
8	6	2	130	64.422
10	6	2	131	50.484
12	6	1	132	69.702
83	8	1	143	71.921
